# Supplementary material for: Diversity decoupled from sulfur isotope fractionation in a sulfate reducing microbial community
Source: bioRxiv or medRxiv preprint supplement (doi:10.1101/518837), 2019-01-11

**Fig. S1. Mineralized sulfur fractions from Gypsum Hill Spring sediments.** y-axis extraction fractions include Milli-Q water extraction of aqueous sulfates ( $\text{SO}_{4, \text{sol}}$ ), methanol extraction of elemental sulfur ( $\text{S}^0$ ), hydrochloric acid extraction of acid volatile sulfides (AVS), acidic chromium extraction of chromium reducible sulfur (CRS), Thode solution extraction of CRS-soluble sulfur ( $\text{CRS}_{\text{sn}}$ ), and Thode solution extraction of CRS-insoluble sulfates ( $\text{SO}_{4, \text{insol}}$ ).

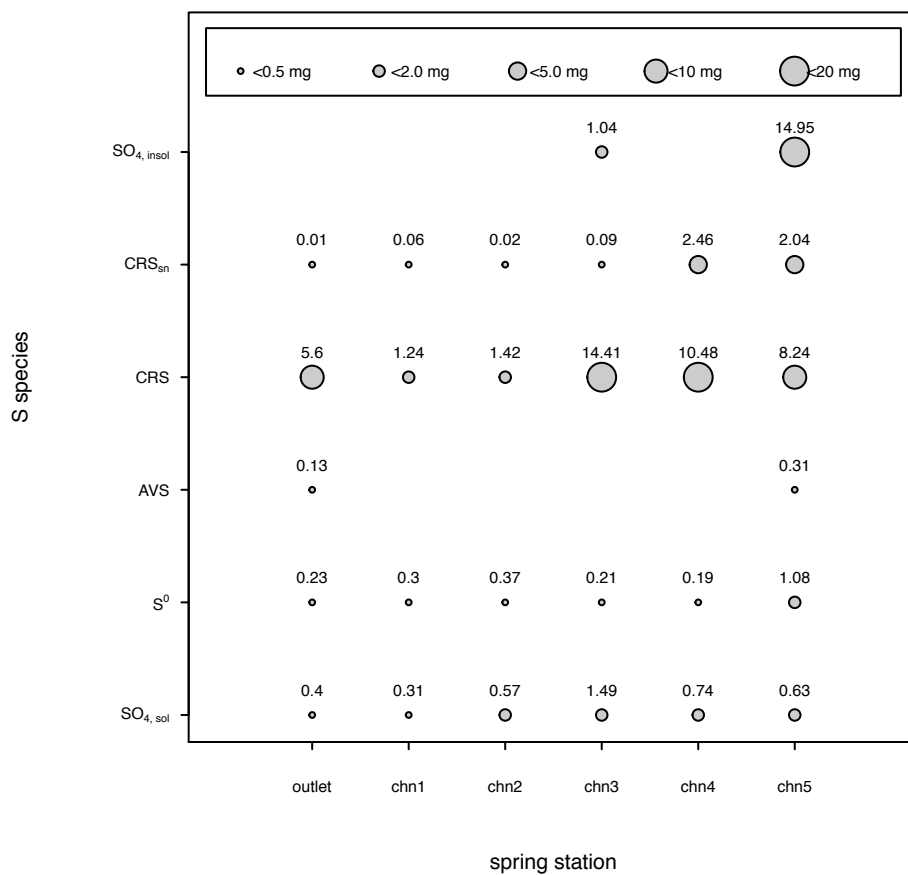

Supplement: Supplementary file [file media-7.pdf]
