# Supplementary material for: Diversity decoupled from sulfur isotope fractionation in a sulfate reducing microbial community
Source: bioRxiv or medRxiv preprint supplement (doi:10.1101/518837), 2019-01-11

**Fig. S2.** Gypsum Hill Spring 4 sediments  $\Delta^{33}\text{S} - \delta^{34}\text{S}$ . Symbols labeled *gyp* are from gypsum rock recovered from the spring's bank;  $W_s$  are spring water samples, 'o' are Outlet samples and numbers 1 through 5 designate Channel stations 1-5.

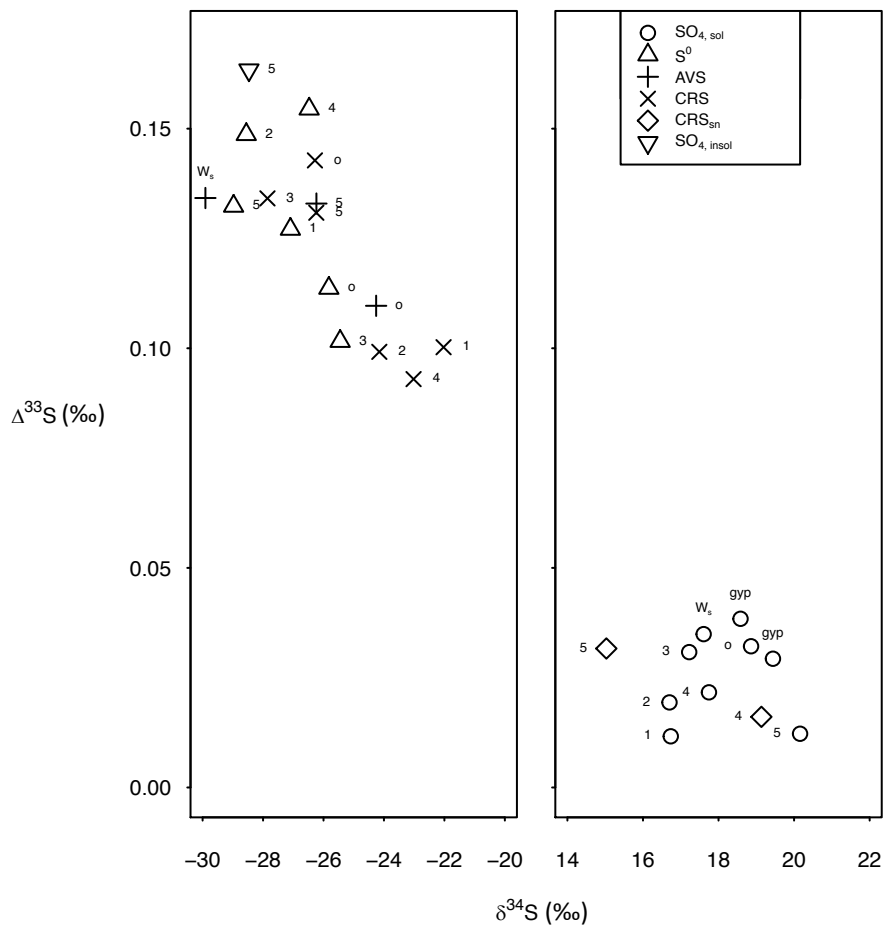

Supplement: Supplementary file [file media-8.pdf]
