# Supplementary material for: Diversity decoupled from sulfur isotope fractionation in a sulfate reducing microbial community
Source: bioRxiv or medRxiv preprint supplement (doi:10.1101/518837), 2019-01-11
Supplement: Supplementary file [file media-9.pdf]

**Fig. S3. Potential sulfide fates in Gypsum Hill Spring 4 sediments.**  $\varphi$  indicate fluxes between various S pools. AVS: acid volatile sulfur, CRS: chromium reducible sulfur.

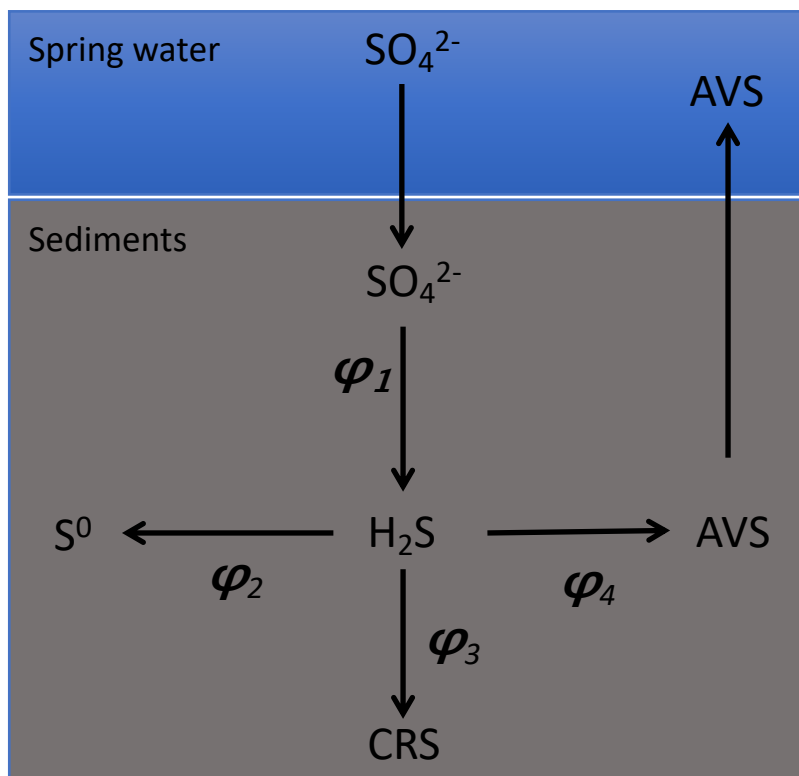

$$\varphi_1 = \varphi_{SO_4^{2-} - H_2S}$$

$$\varphi_2 = \varphi_{H_2S - S^0}$$

$$\varphi_3 = \varphi_{H_2S - CRS}$$

$$\varphi_4 = \varphi_{H_2S - AVS}$$
